# Supplementary material for: Fitness landscape of substrate-adaptive mutations in evolved amino acid-polyamine-organocation transporters
Source: eLife. 2024 Jun 25;13:RP93971. doi: 10.7554/eLife.93971 (PMC11198987; doi:10.7554/eLife.93971)
Supplement: Figure 1—source data 1. — Growth rate values of Δ10AA expressing either one of the seven different wild-type YAT genes (AGP1, BAP2, CAN1, HIP1, LYP1, MMP1, PUT4) from pADHXC3GH and the empty vector control on 2 mM of each amino acid. The growth rates were calculated based on Figure 1—figure supplement 1. [file elife-93971-fig1-data1.xlsx]

## Sheet: Sheet1
Figure 1 - Source data 1
Growth rates of YAT expressing yeast.
Growth rate values of Δ10AA expressing either one of the seven different wild-type yeast amino acid transporter genes (AGP1, BAP2, CAN1, HIP1, LYP1, MMP1, PUT4) from pADHXC3GH and the empty vector control on 2 mM of each amino acid. The growth rates were calculated based on Figure 1-Figure supplement 1.
N source	Strain	Mean µ	S.E.M. µ
Ala	AGP1	0.23	0.0048
Ala	BAP2	0.25	0.0053
Ala	CAN1	0	0
Ala	HIP1	0	0
Ala	LYP1	0.15	0.0003
Ala	MMP1	0.02	0.0226
Ala	PUT4	0.21	0.0068
Ala	vector	0	0
Asn	AGP1	0.27	0.0043
Asn	BAP2	0.29	0.0082
Asn	CAN1	0.02	0.0187
Asn	HIP1	0	0
Asn	LYP1	0.03	0.0037
Asn	MMP1	0	0
Asn	PUT4	0	0
Asn	vector	0	0
Asp	AGP1	0.25	0.0022
Asp	BAP2	0.15	0.0027
Asp	CAN1	0	0
Asp	HIP1	0	0
Asp	LYP1	0	0
Asp	MMP1	0	0
Asp	PUT4	0	0
Asp	vector	0	0
Cit	AGP1	0.03	0.0044
Cit	BAP2	0.07	0.0068
Cit	CAN1	0.03	0.0036
Cit	HIP1	0	0
Cit	LYP1	0	0
Cit	MMP1	0.02	0.02
Cit	PUT4	0	0
Cit	vector	0.01	0.0069
GABA	AGP1	0.17	0.0062
GABA	BAP2	0	0
GABA	CAN1	0	0
GABA	HIP1	0	0
GABA	LYP1	0	0
GABA	MMP1	0	0
GABA	PUT4	0.28	0.0155
GABA	vector	0	0
Gln	AGP1	0.31	0.0194
Gln	BAP2	0.31	0.0033
Gln	CAN1	0.07	0.0087
Gln	HIP1	0.05	0.0094
Gln	LYP1	0.04	0.0022
Gln	MMP1	0.08	0.0085
Gln	PUT4	0.07	0.0078
Gln	vector	0.05	0.0042
Glu	AGP1	0.23	0.0034
Glu	BAP2	0.21	0.007
Glu	CAN1	0	0
Glu	HIP1	0	0
Glu	LYP1	0	0
Glu	MMP1	0	0
Glu	PUT4	0	0
Glu	vector	0	0
Gly	AGP1	0.05	0.0033
Gly	BAP2	0.07	0.0045
Gly	CAN1	0.05	0.002
Gly	HIP1	0.04	0.0008
Gly	LYP1	0.04	0.0041
Gly	MMP1	0.04	0.0029
Gly	PUT4	0.06	0.0047
Gly	vector	0.05	0.0026
Ile	AGP1	0.14	0.0029
Ile	BAP2	0.14	0.0019
Ile	CAN1	0.02	0.0159
Ile	HIP1	0	0
Ile	LYP1	0.03	0.0143
Ile	MMP1	0.02	0.0166
Ile	PUT4	0	0
Ile	vector	0.01	0.0088
Leu	AGP1	0.2	0.0043
Leu	BAP2	0.21	0.0036
Leu	CAN1	0.06	0.0091
Leu	HIP1	0.05	0.0044
Leu	LYP1	0.06	0.0074
Leu	MMP1	0.05	0.0066
Leu	PUT4	0.04	0.0045
Leu	vector	0.05	0.005
Met	AGP1	0.17	0.0031
Met	BAP2	0.19	0.005
Met	CAN1	0.06	0.0043
Met	HIP1	0.05	0.0017
Met	LYP1	0.08	0.002
Met	MMP1	0.05	0.0034
Met	PUT4	0.03	0.001
Met	vector	0.05	0.0025
Phe	AGP1	0.21	0.0026
Phe	BAP2	0.18	0.0023
Phe	CAN1	0.05	0.0043
Phe	HIP1	0.02	0.0121
Phe	LYP1	0.08	0.0025
Phe	MMP1	0.04	0.0056
Phe	PUT4	0.03	0.0142
Phe	vector	0.04	0.0041
Pro	AGP1	0.19	0.0055
Pro	BAP2	0.13	0.005
Pro	CAN1	0	0
Pro	HIP1	0	0
Pro	LYP1	0	0
Pro	MMP1	0	0
Pro	PUT4	0.22	0.0117
Pro	vector	0	0
Ser	AGP1	0.27	0.0032
Ser	BAP2	0.21	0.0032
Ser	CAN1	0.02	0.0056
Ser	HIP1	0	0
Ser	LYP1	0.16	0.0081
Ser	MMP1	0	0
Ser	PUT4	0.21	0.0264
Ser	vector	0	0
Thr	AGP1	0.17	0.0019
Thr	BAP2	0.17	0.004
Thr	CAN1	0	0
Thr	HIP1	0.02	0.0169
Thr	LYP1	0	0
Thr	MMP1	0	0
Thr	PUT4	0	0
Thr	vector	0	0
Trp	AGP1	0.11	0.003
Trp	BAP2	0	0
Trp	CAN1	0	0
Trp	HIP1	0.04	0.0034
Trp	LYP1	0	0
Trp	MMP1	0.05	0.0053
Trp	PUT4	0.08	0.0376
Trp	vector	0.04	0.0144
Tyr	AGP1	0.16	0.0069
Tyr	BAP2	0.16	0.0058
Tyr	CAN1	0.06	0.0285
Tyr	HIP1	0	0
Tyr	LYP1	0.04	0.0238
Tyr	MMP1	0.02	0.0201
Tyr	PUT4	0.02	0.0188
Tyr	vector	0.01	0.0126
Val	AGP1	0.23	0.0129
Val	BAP2	0.25	0.0131
Val	CAN1	0.02	0.0204
Val	HIP1	0	0
Val	LYP1	0.03	0.0058
Val	MMP1	0.05	0.0049
Val	PUT4	0.03	0.0069
Val	vector	0	0
